# Supplementary material for: CuSCN as the Back Contact for Efficient ZMO/CdTe Solar Cells
Source: MDPI journal article supplement (doi:10.3390/ma13081991), 2020-04-24
Supplement: s1 [file s1]

# CuSCN as the Back Contact for Efficient ZMO/CdTe Solar Cells

Deng-Bing Li <sup>1</sup>, Zhaoning Song <sup>1</sup>, Sandip S. Bista <sup>1</sup>, Fadhil K. Alfadhili <sup>1</sup>, Rasha A. Awni <sup>1</sup>, Niraj Shrestha <sup>1</sup>, DeMilt Rhiannon <sup>2</sup>, Adam B. Phillips <sup>1</sup>, Michael J. Heben <sup>1</sup>, Randy J. Ellingson <sup>1</sup>, Feng Yan <sup>3</sup> and Yanfa Yan <sup>1,\*</sup>

<sup>1</sup> Department of Physics and Astronomy, and Wright Center for Photovoltaics Innovation and Commercialization (PVIC), University of Toledo, Toledo, OH 43606, USA; dengbing.li@utoledo.edu (D.-B.L.); zhaoning.song@utoledo.edu (Z.S.); sandip.bista@rockets.utoledo.edu (S.S.B.); fadhil.alfadhili@rockets.utoledo.edu (F.K.A.); rasha.awni@rockets.utoledo.edu (R.A.A.); niraj.shrestha@rockets.utoledo.edu (N.S.); adam.phillips@utoledo.edu (A.B.P.); michael.heben@utoledo.edu (M.J.H.); randy.ellingson@utoledo.edu (R.J.E.)

<sup>2</sup> Ottawa Hills Junior/senior high school, Ottawa Hills Local Schools, Ottawa Hills, OH 43606, USA; rdemilt20@ohschools.org

<sup>3</sup> Department of Metallurgical and Materials Engineering, The University of Alabama, Tuscaloosa, Alabama, 35487, USA; fyan@eng.ua.edu

\* Correspondence: yanfa.yan@utoledo.edu

Received: 21 March 2020; Accepted: 21 April 2020; Published: date

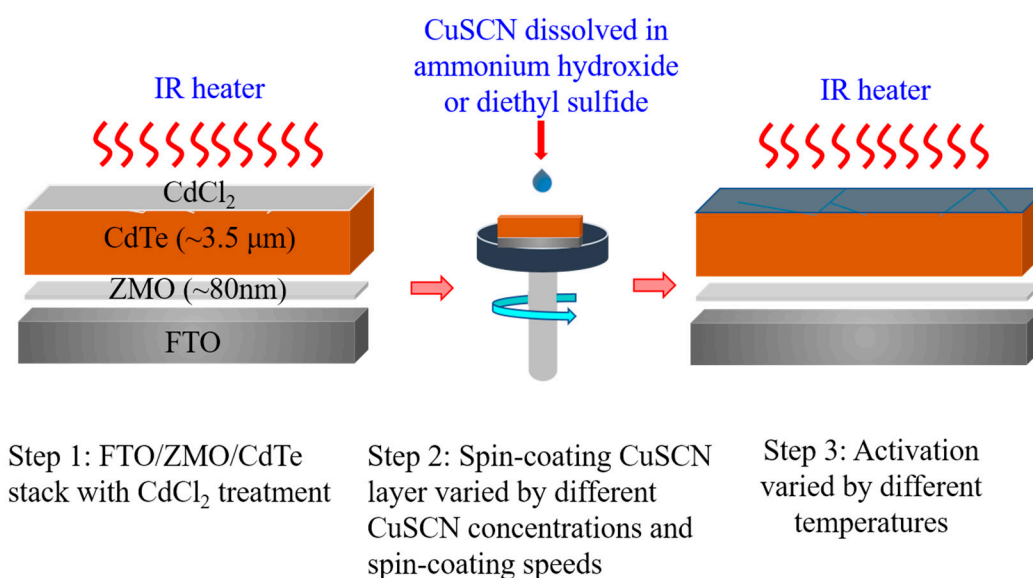

**Figure S1.** Schematic illustration of technological steps and investigation design in this work.

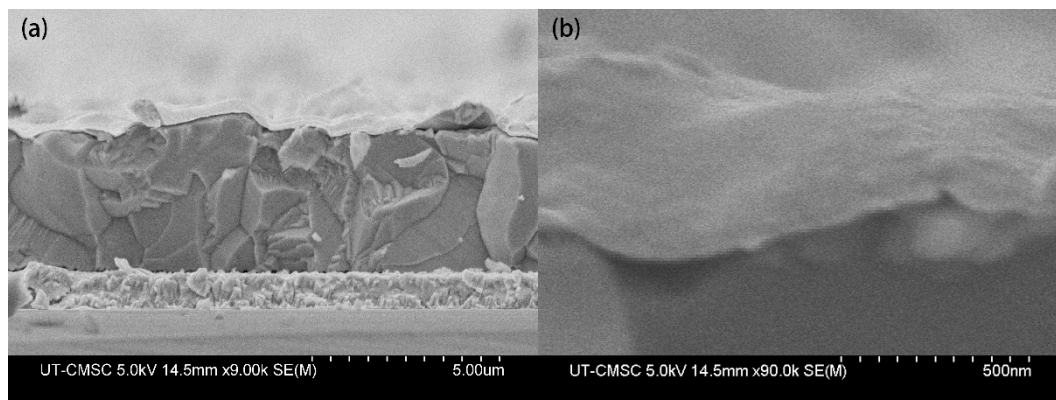

**Figure S2.** Cross-sectional SEM images of complete devices with CuSCN as back contact in (a) low and (b) high magnification.

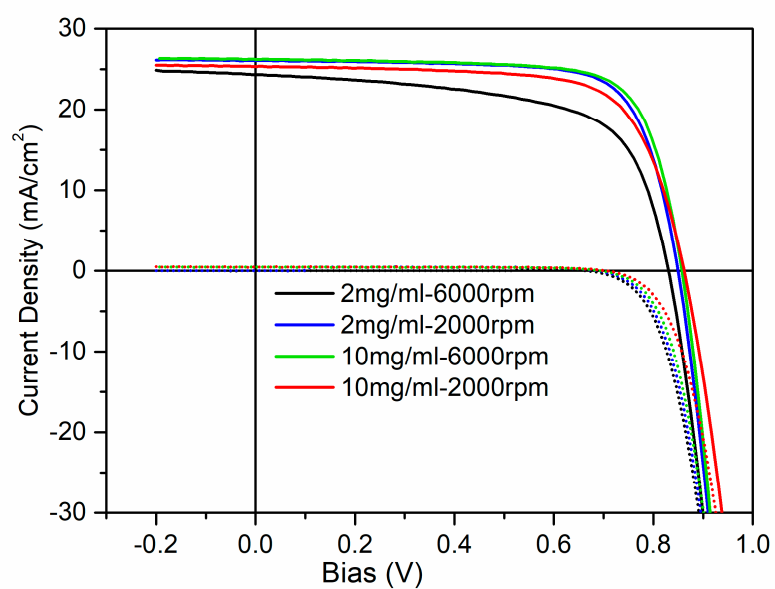

**Figure S3.** J-V curves the best cells in devices with different CuSCN thickness.

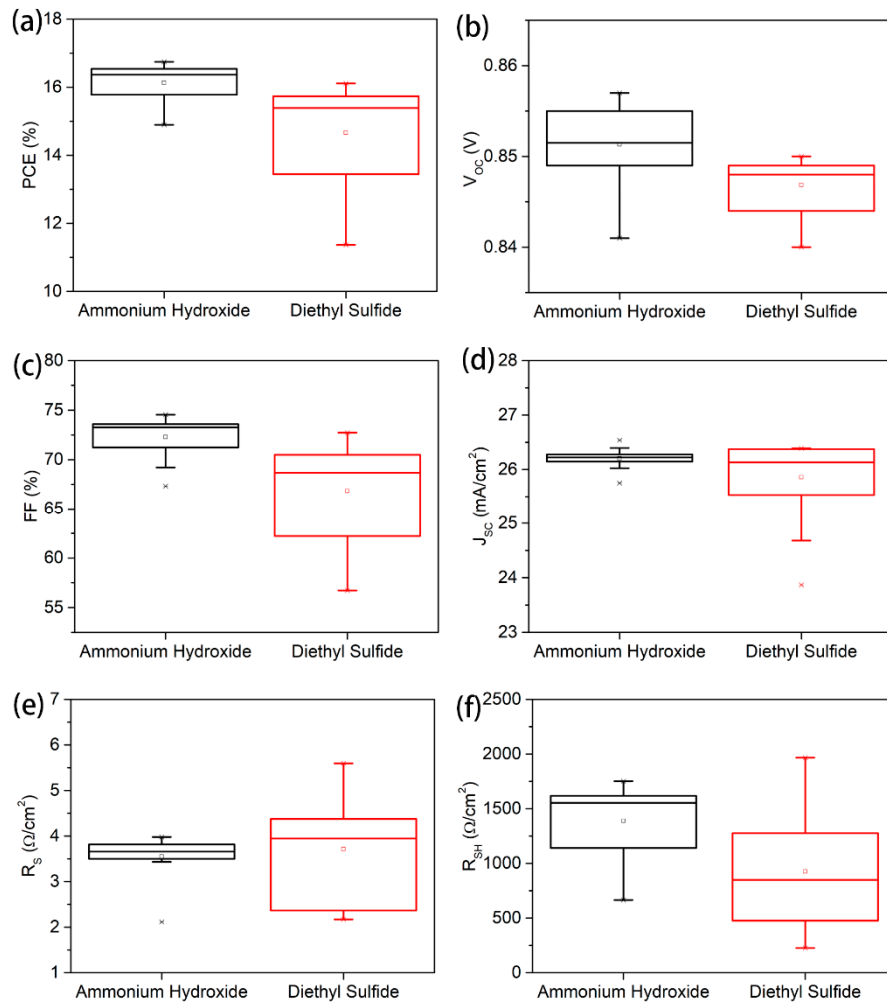

**Figure S4.** Statistical results for MZO/CdTe solar cell performances of (a) PCE, (b)  $V_{oc}$ , (c) FF, (d)  $J_{sc}$ , (e) series resistance ( $R_s$ ), and (f) shunt resistance ( $R_{sh}$ ) with different CuSCN solutions.

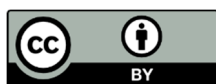

© 2020 by the authors. Submitted for possible open access publication under the terms and conditions of the Creative Commons Attribution (CC BY) license (<http://creativecommons.org/licenses/by/4.0/>).
